# Supplementary material for: Catalytic oxidation of 4-chlorophenol with magnetic Fe3O4 nanoparticles: mechanisms and particle transformation
Source: Royal Society of Chemistry journal article supplement (doi:10.1039/c5ra10433e), 2015-01-01
Supplement: c5ra10433e1.pdf [file c5ra10433e1.pdf]

## Supplementary Materials

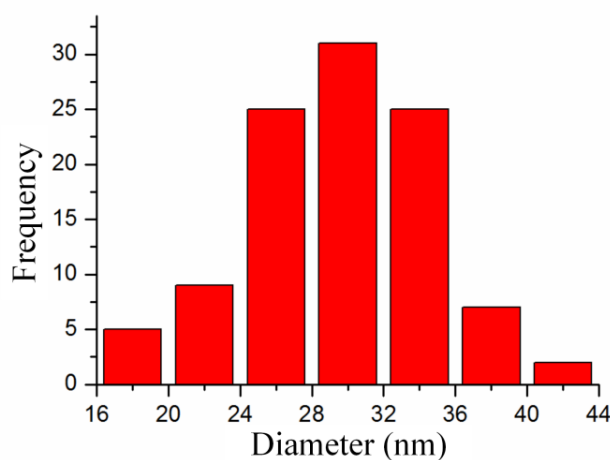

Fig. A1. Distribution of as-prepared  $\text{Fe}_3\text{O}_4$  particles sizes.

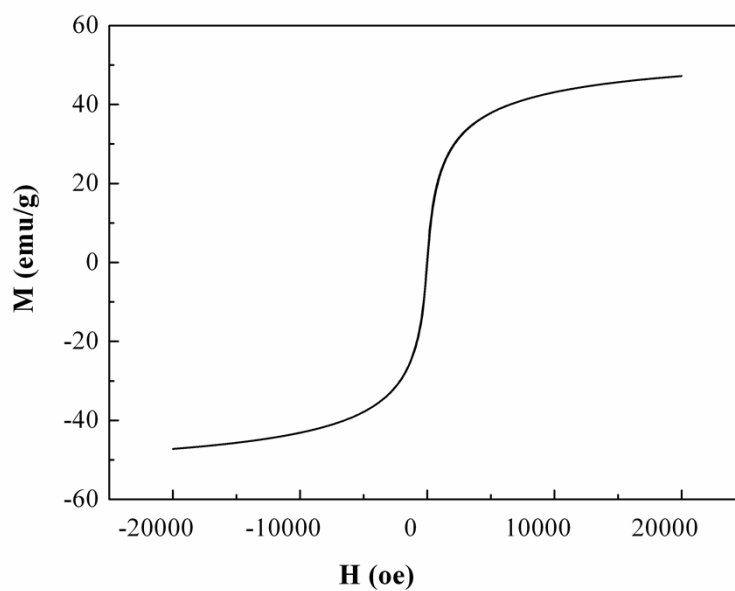

Fig. A2. Magnetization curve of as-prepared particles.

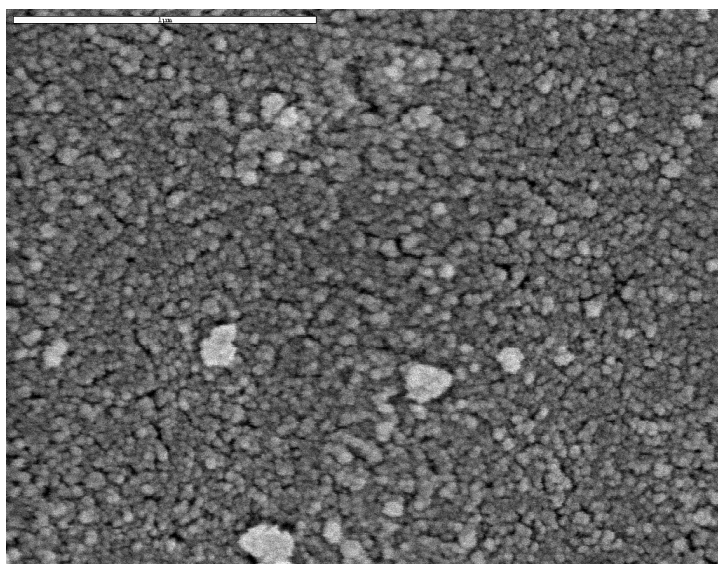

Fig. A3. SEM image of  $\text{Fe}_3\text{O}_4$  nanoparticles after reaction without  $\text{H}_2\text{O}_2$ .

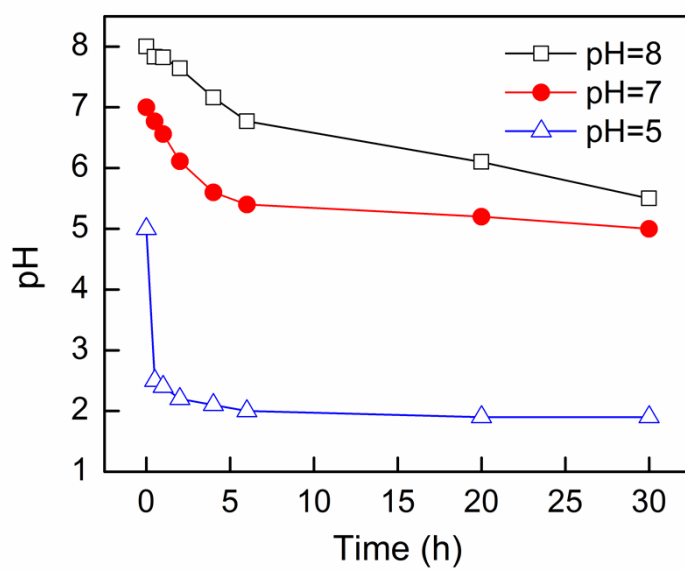

Fig. A4. Changes of pH value during reaction at the different initial pH values

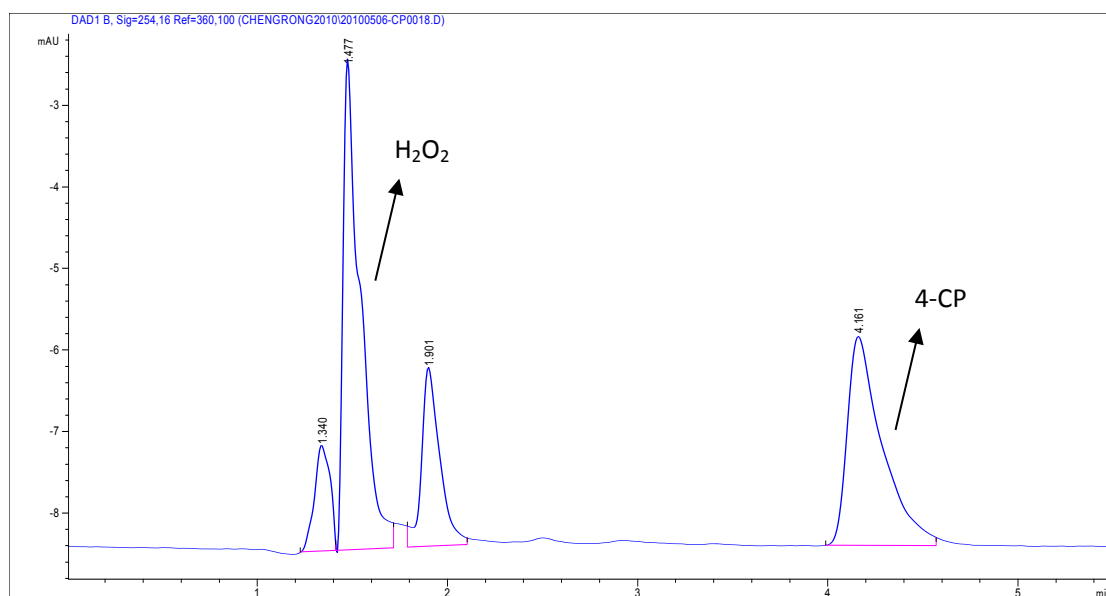

Fig. A5. HPLC spectrum of solutions after reaction
